# Supplementary material for: Fluorescent monitoring of the reaction kinetics of nonfluorescent molecules enabled by a fluorescent receptor
Source: Royal Society of Chemistry journal article supplement (doi:10.1039/c9cc00762h), 2019-01-01
Supplement: c9cc00762h1.pdf [file c9cc00762h1.pdf]

# Fluorescent Monitoring on the Reaction Kinetics of Nonfluorescent Molecules Enabled by a Fluorescent Receptor

Lin-Ming Bai,<sup>abc</sup> Hang Zhou,<sup>c</sup> Wei-Er Liu,<sup>c</sup> Hongxin Chai,<sup>c</sup> Liu-Pan Yang,<sup>c</sup> Wei Yan,<sup>a</sup>  
Wen Zhang,<sup>\*b</sup> Hong-Hui Yang,<sup>\*a</sup> and Wei Jiang<sup>\*c</sup>

*<sup>a</sup>State Key Laboratory of Multiphase Flow in Power Engineering, Department of Environmental Science & Engineering, Xi'an Jiaotong University, Xi'an, 710049, China. E-mail: yanghonghui@mail.xjtu.edu.cn.*

*<sup>b</sup>School of Science, Xi'an Jiaotong University, Xi'an 710049, China. E-mail: zhangwen@mail.xjtu.edu.cn.*

*<sup>c</sup>Department of Chemistry, Southern University of Science and Technology, Shenzhen, 518055, China. E-mail: jiangw@sustc.edu.cn*

## Table of Contents

|                                                        |     |
|--------------------------------------------------------|-----|
| 1. Experimental Section .....                          | S2  |
| 2. Fluorescence Quantum Yield and Lifetime.....        | S3  |
| 3. Binding Constants of <b>1</b> to Esters.....        | S4  |
| 4. Binding Constants of <b>1</b> to Alcohols.....      | S9  |
| 5. Monitoring the Hydrolysis Kinetics of Esters.....   | S13 |
| 6. Derivation of Equations on Hydrolysis Kinetics..... | S21 |

## 1. Experimental Section

**1.1 General Method.** Reagents and solvents are commercially available and used without further purification.  $^1\text{H}$  NMR spectra were recorded on a Bruker Avance-400 NMR spectrometer. All chemical shifts are reported in ppm with sodium methanesulfonate as the internal standard. Fluorescence spectra were recorded on a Shimadzu RF-5301pc spectrometer. The determination methods of binding constants using fluorescence titrations and  $^1\text{H}$  NMR titrations were reported earlier.<sup>1</sup> The synthesis of molecular tubes **1** has been reported.<sup>2</sup>

**1.2 Monitoring the Hydrolysis Kinetics of Esters.** For fluorescence monitoring, **1** (5.0  $\mu\text{M}$ ) was dissolved in the buffer solution (pH= 11.9, confirmed by pH meter) which was prepared from  $\text{Na}_2\text{HPO}_4$  (25 mM) and NaOH (27 mM). This solution (2.0 ml) was placed in a cuvette at 25  $^\circ\text{C}$ . 330 nm was selected as excitation wavelength, and the emission intensity at 403 nm was monitored. Ester was added to this solution containing **1**, and fluorescence intensity at 403 nm was monitored to follow the hydrolysis kinetics of ester.

---

1 H. Yao, H. Ke, X. Zhang, S.-J. Pan, M.-S. Li, L.-P. Yang, G. Schreckenbach and W. Jiang, *J. Am. Chem. Soc.*, 2018, **140**, 13466.

2 G.-B. Huang, S.-H. Wang, H. Ke, L.-P. Yang and W. Jiang, *J. Am. Chem. Soc.*, 2016, **138**, 14550.

## 2. Fluorescence Quantum Yield and Lifetime

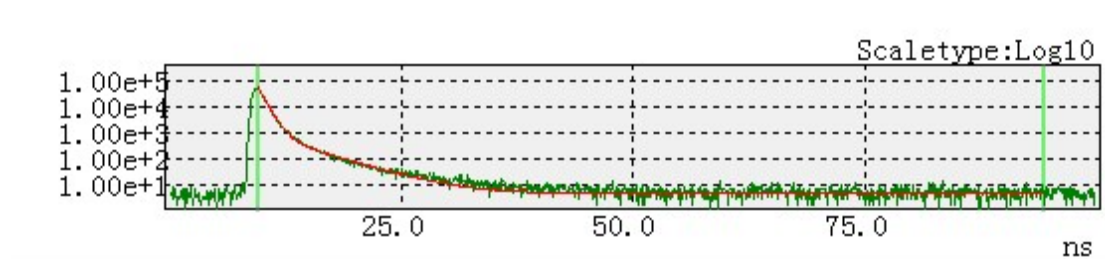

| excitation wavelength (nm) | fluorescence quantum yield (%) |
|----------------------------|--------------------------------|
| 330                        | 1.7                            |
| 340                        | 1.8                            |
| 350                        | 1.8                            |
| 360                        | 1.9                            |
| 370                        | 1.8                            |

**Fig. S1** Curve fit of the fluorescence lifetime of **1** (20  $\mu$ M) in water. excitation wavelength= 340 nm, emission wavelength= 403 nm, and the fluorescence quantum yield of different excitation wavelength of **1**.

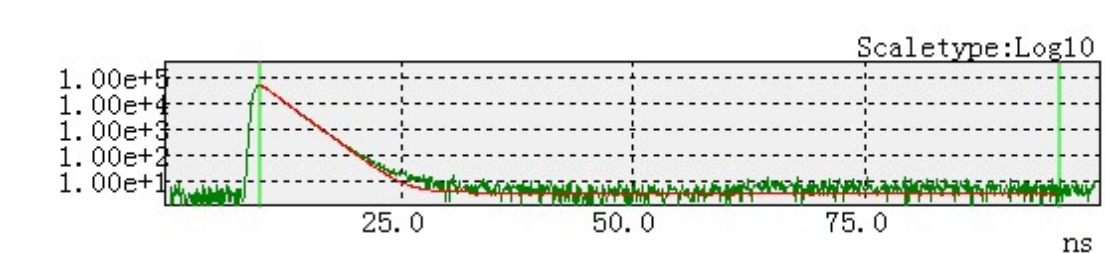

| excitation wavelength (nm) | fluorescence quantum yield (%) |
|----------------------------|--------------------------------|
| 330                        | 5.4                            |
| 340                        | 5.2                            |
| 350                        | 5.4                            |
| 360                        | 5.5                            |
| 370                        | 5.2                            |

**Fig. S2** Curve fit of the fluorescence lifetime of **1** (20  $\mu$ M) in the presence of ethyl acetate (8 mM ). excitation wavelength= 340 nm, emission wavelength= 403 nm. The fluorescence quantum yields of the host-guest complex at different excitation wavelengths were listed in the Table.

### 3. Binding Constants of **1** to Esters

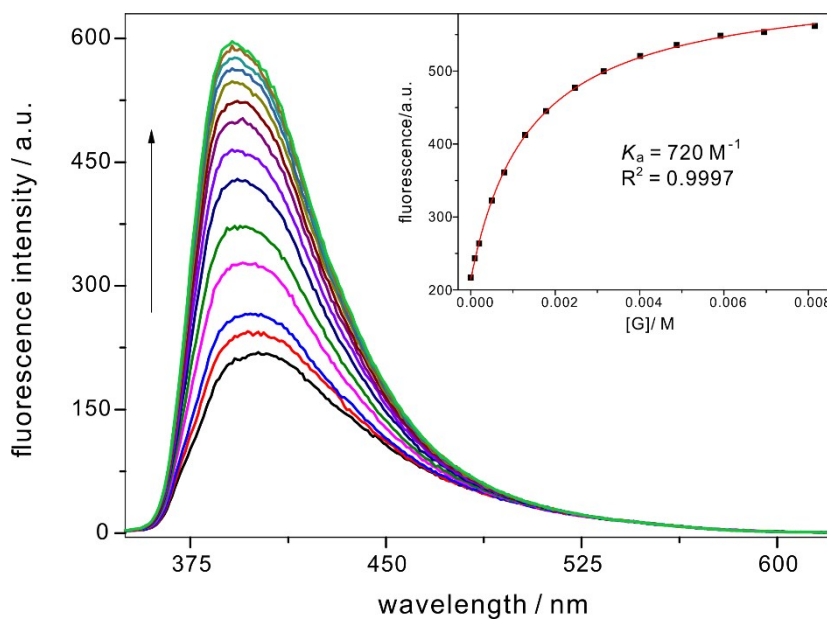

**Fig. S3** Fluorescence spectra of **1** (5.0  $\mu\text{M}$ ) when titrated with methyl acetate in deionized  $\text{H}_2\text{O}$  at 25  $^\circ\text{C}$ . Inset: curve fit of the titration data according to a 1:1 binding stoichiometry.

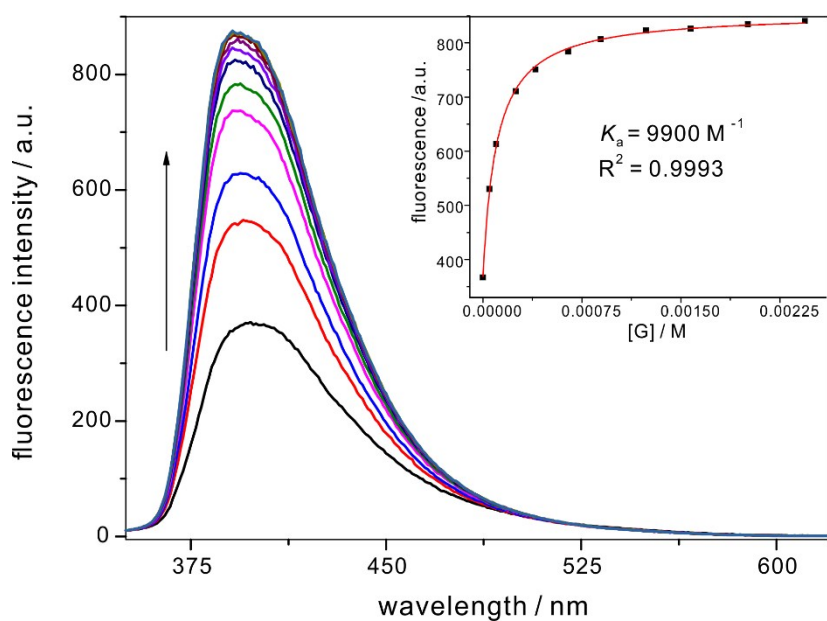

**Fig. S4** Fluorescence spectra of **1** (5.0  $\mu\text{M}$ ) when titrated with propyl acetate in deionized  $\text{H}_2\text{O}$  at 25  $^\circ\text{C}$ . Inset: curve fit of the titration data according to a 1:1 binding stoichiometry.

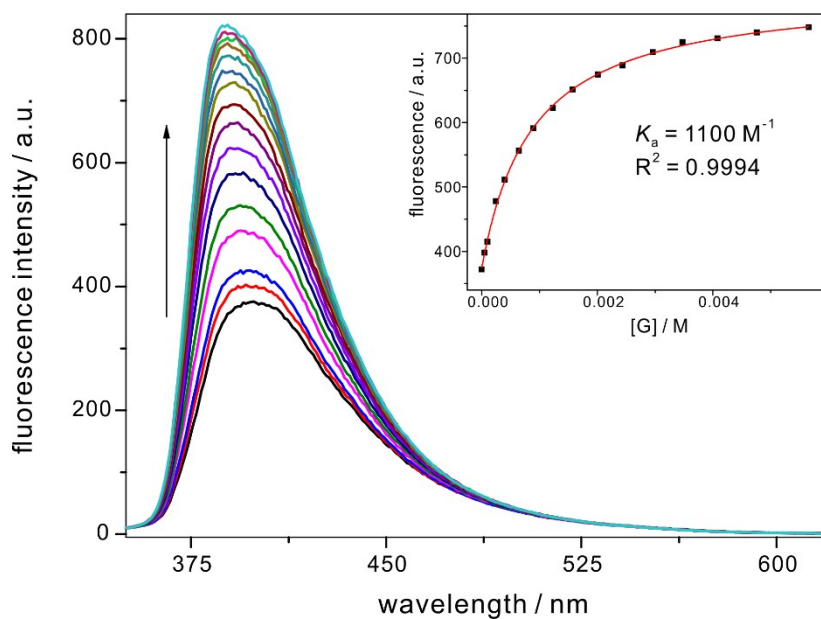

**Fig. S5** Fluorescence spectra of **1** (5.0 μM) when titrated with isopropyl acetate in deionized H<sub>2</sub>O at 25 °C. Inset: curve fit of the titration data according to a 1:1 binding stoichiometry.

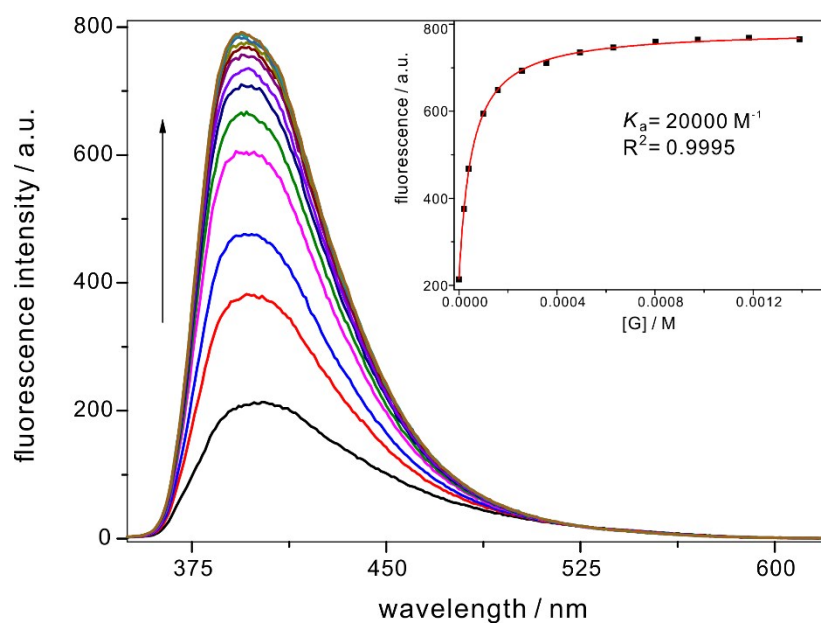

**Fig. S6** Fluorescence spectra of **1** (5.0 μM) when titrated with butyl acetate in deionized H<sub>2</sub>O at 25 °C. Inset: curve fit of the titration data according to a 1:1 binding stoichiometry.

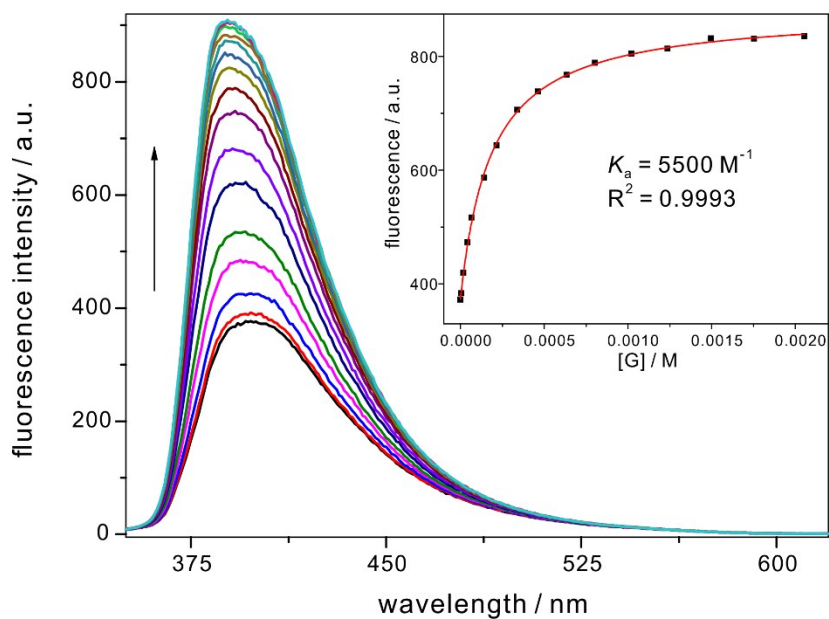

**Fig. S7** Fluorescence spectra of **1** (5.0  $\mu\text{M}$ ) when titrated with isobutyl acetate in deionized  $\text{H}_2\text{O}$  at 25  $^\circ\text{C}$ . Inset: curve fit of the titration data according to a 1:1 binding stoichiometry.

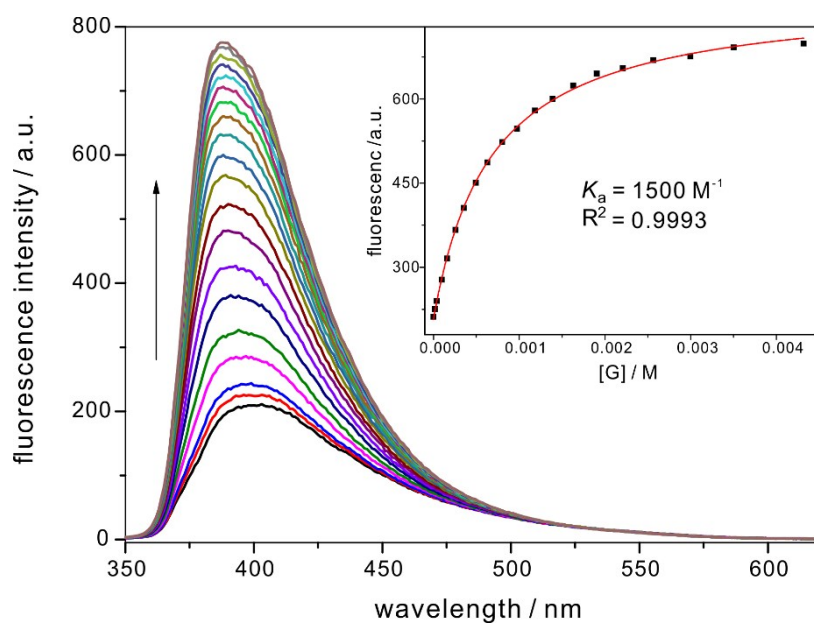

**Fig. S8** Fluorescence spectra of **1** (5.0  $\mu\text{M}$ ) when titrated with sec-butyl acetate in deionized  $\text{H}_2\text{O}$  at 25  $^\circ\text{C}$ . Inset: curve fit of the titration data according to a 1:1 binding stoichiometry.

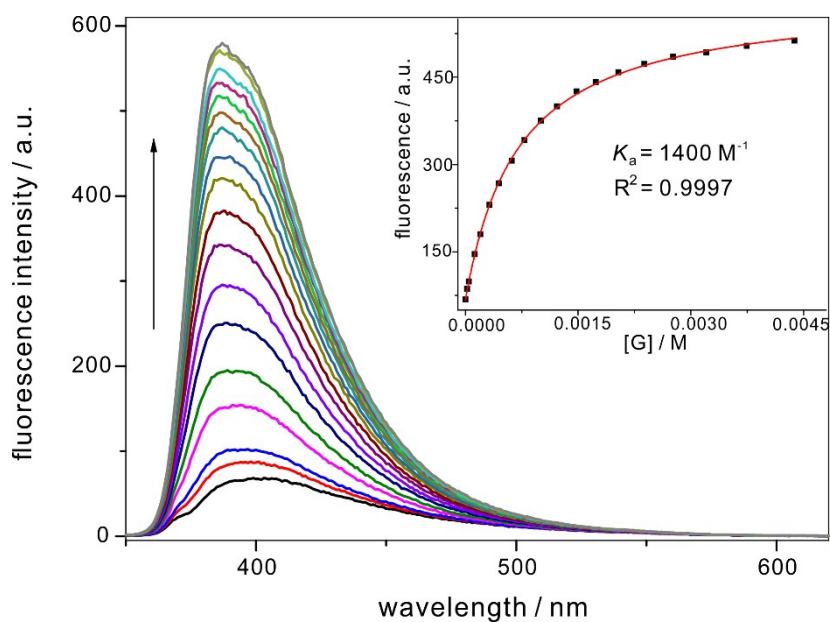

**Fig. S9** Fluorescence spectra of **1** (5.0  $\mu\text{M}$ ) when titrated with tert-butyl acetate in deionized  $\text{H}_2\text{O}$  at 25  $^\circ\text{C}$ . Inset: curve fit of the titration data according to a 1:1 binding stoichiometry.

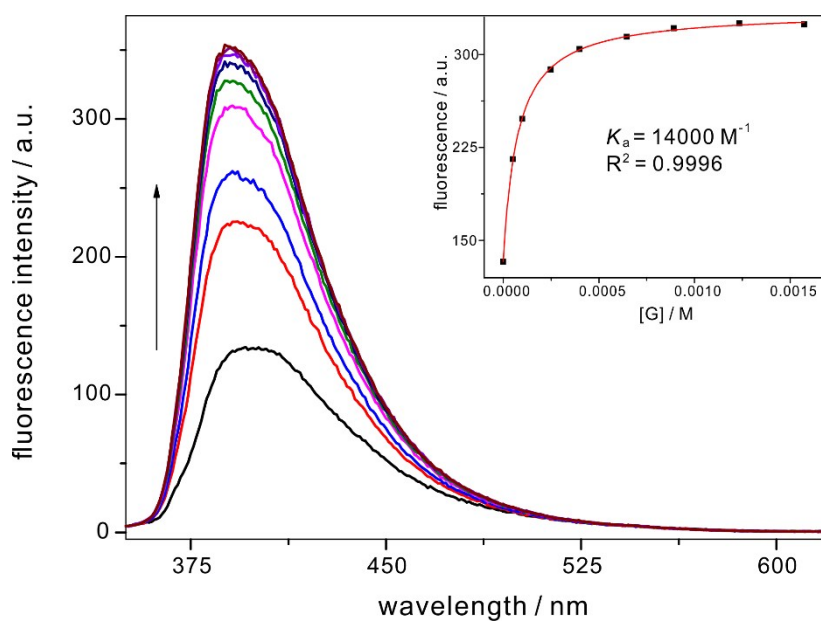

**Fig. S10** Fluorescence spectra of **1** (5.0  $\mu\text{M}$ ) when titrated with ethyl propionate in deionized  $\text{H}_2\text{O}$  at 25  $^\circ\text{C}$ . Inset: curve fit of the titration data according to a 1:1 binding stoichiometry.

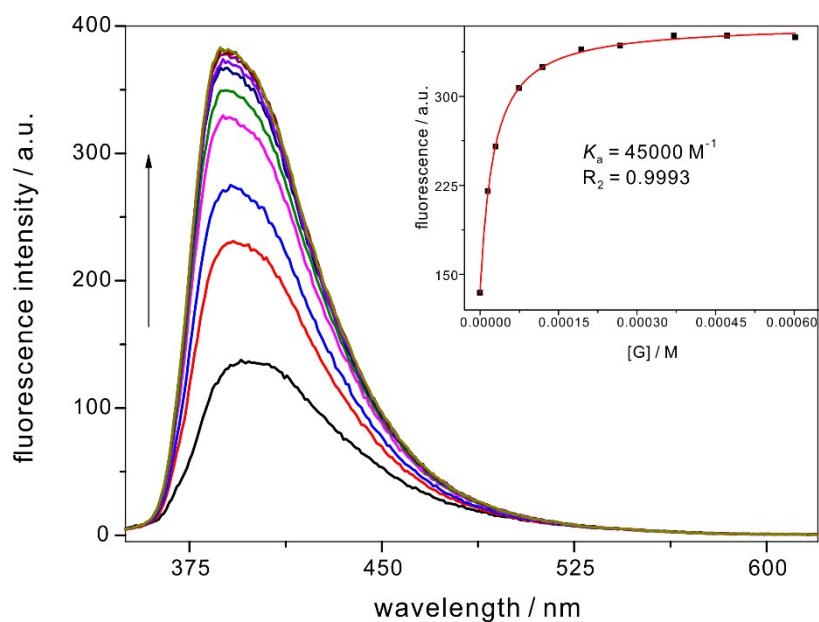

**Fig. S11** Fluorescence spectra of **1** (5.0  $\mu\text{M}$ ) when titrated with ethyl butyrate in deionized  $\text{H}_2\text{O}$  at 25  $^\circ\text{C}$ . Inset: curve fit of the titration data according to a 1:1 binding stoichiometry.

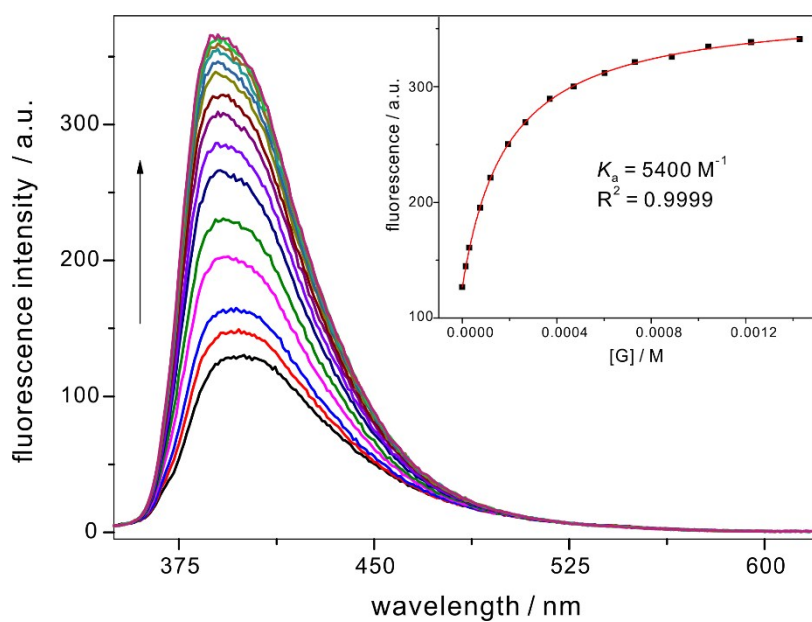

**Fig. S12** Fluorescence spectra of **1** (5.0  $\mu\text{M}$ ) when titrated with ethyl isobutyrate in deionized  $\text{H}_2\text{O}$  at 25  $^\circ\text{C}$ . Inset: curve fit of the titration data according to a 1:1 binding stoichiometry.

#### 4. Binding Constants of **1** to Alcohols

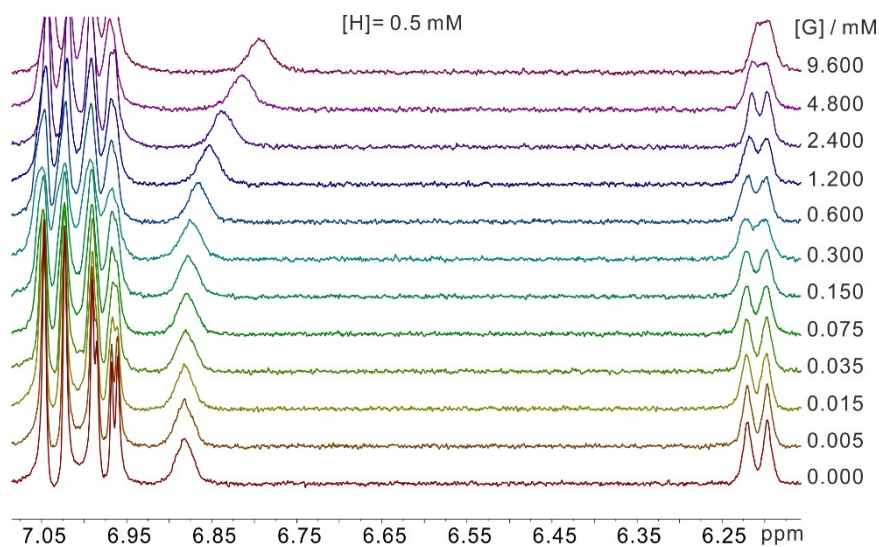

**Fig. S13** Partial  $^1\text{H}$  NMR spectra (400 MHz,  $\text{H}_2\text{O}:\text{D}_2\text{O} = 9:1$ , 25  $^\circ\text{C}$ ) of **1** (0.5 mM) when titrated by propyl alcohol (0~9.6 mM).

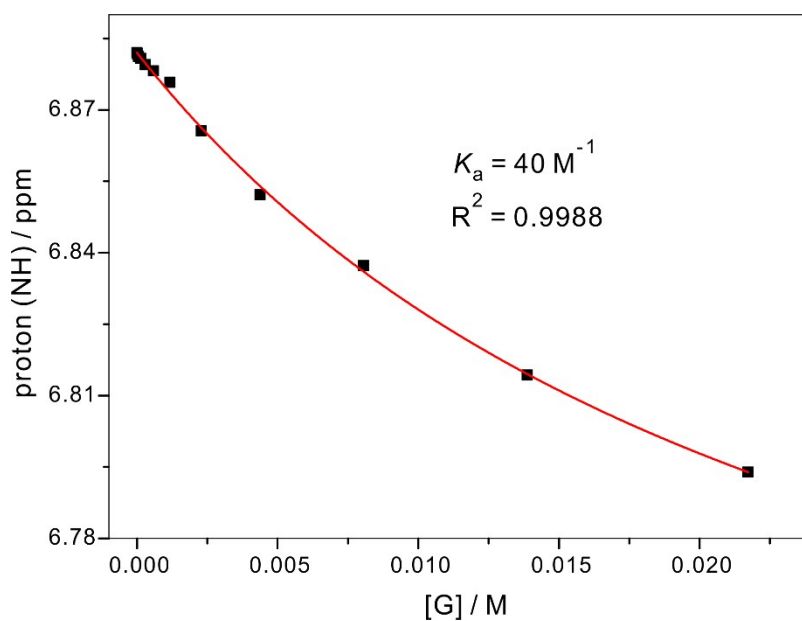

**Fig. S14** Nonlinear fitting of the NMR titration curve of **1** by propyl alcohol. The chemical shift of amide NH protons on **1** is monitored.

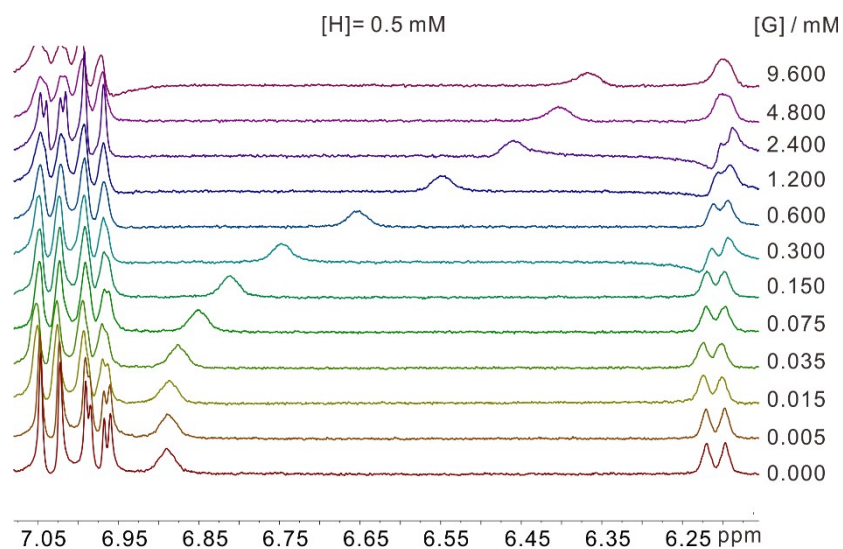

**Fig. S15** Partial  $^1\text{H}$  NMR spectra (400 MHz,  $\text{H}_2\text{O}$ :  $\text{D}_2\text{O}$  = 9: 1, 25 °C) of **1** (0.5 mM) titrated by butyl alcohol (0~9.6 mM).

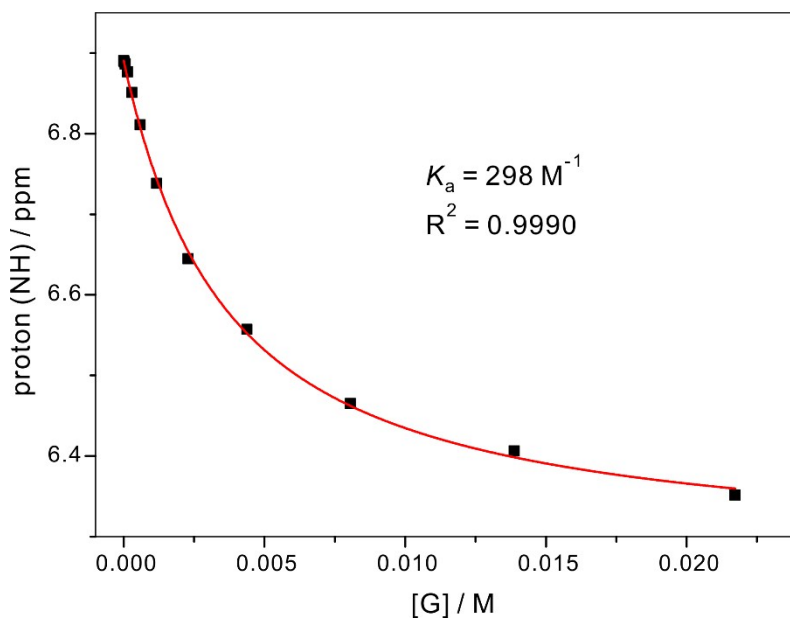

**Fig. S16** Nonlinear fitting of the NMR titration curve of **1** by butyl alcohol. The chemical shift of amide NH protons on **1** is monitored.

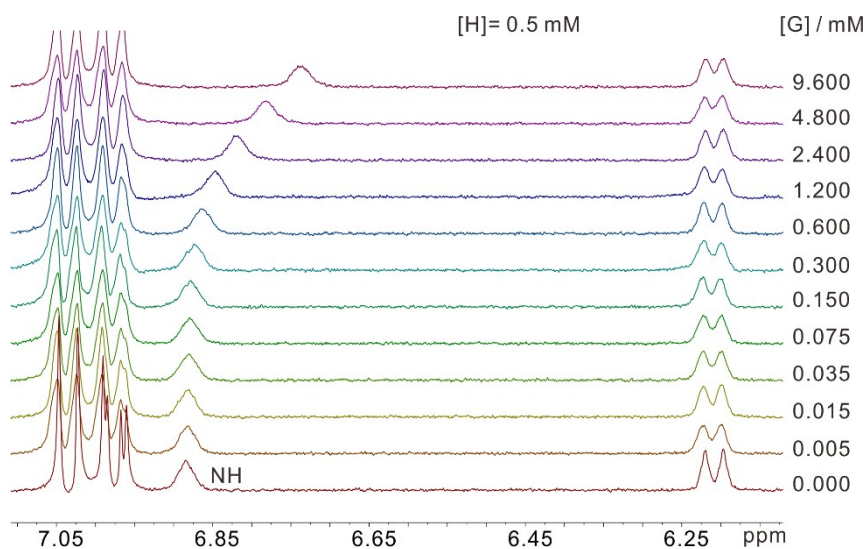

**Fig. S17** Partial  $^1\text{H}$  NMR spectra (400 MHz,  $\text{H}_2\text{O}:\text{D}_2\text{O} = 9:1$ , 25 °C) of **1** (0.5 mM) titrated by isobutyl alcohol (0~9.6 mM).

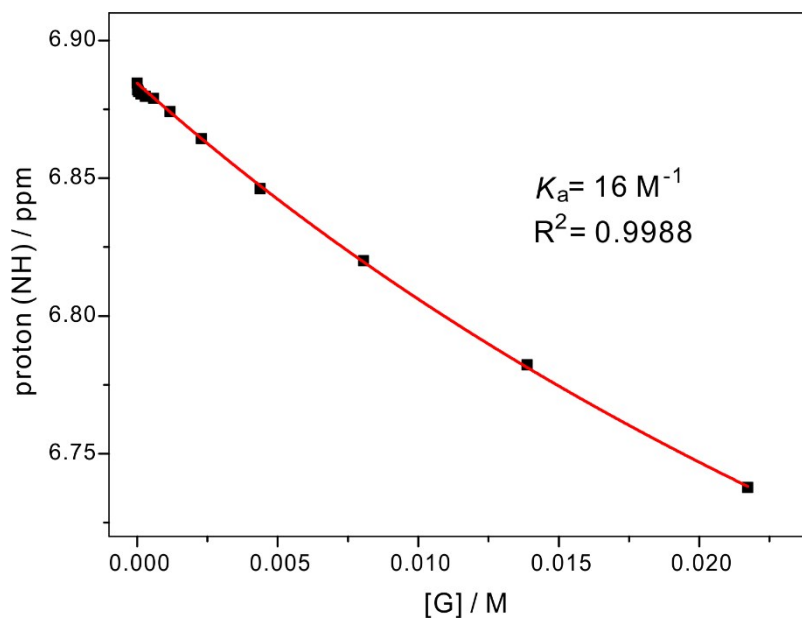

**Fig. S18** Nonlinear fitting of the NMR titration curve of **1** by isobutyl alcohol. The chemical shift of amide NH protons on **1** is monitored.

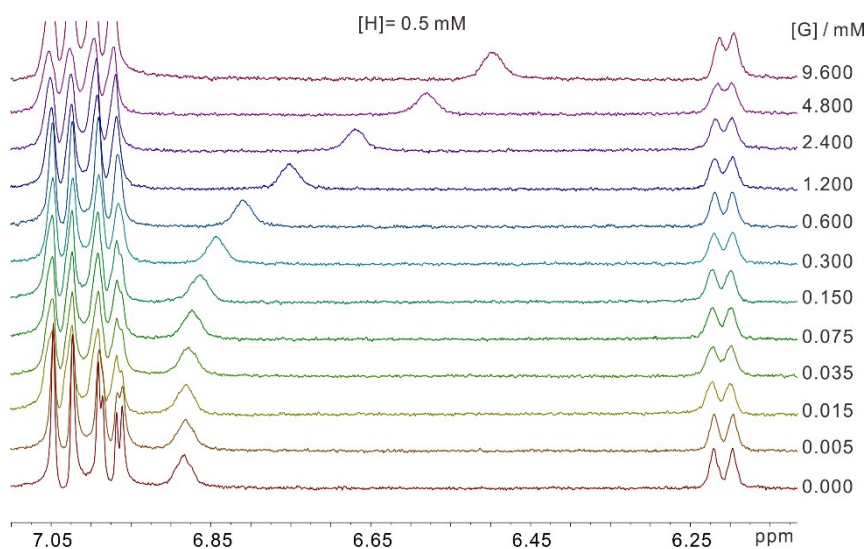

**Fig. S19** Partial  $^1\text{H}$  NMR spectra (400 MHz,  $\text{H}_2\text{O}:\text{D}_2\text{O} = 9:1$ , 25  $^\circ\text{C}$ ) of **1** (0.5 mM) titrated by sec-butyl alcohol (0~9.6 mM).

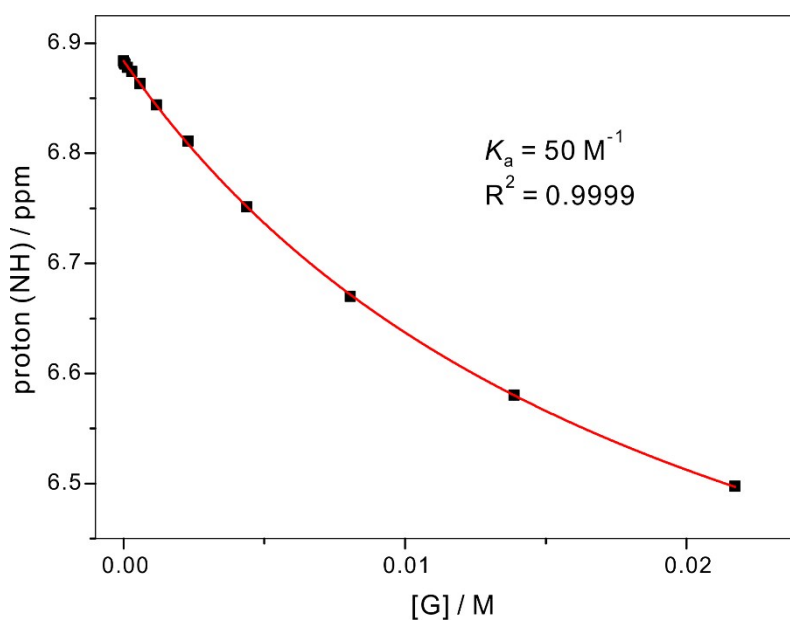

**Fig. S20** Nonlinear fitting of the NMR titration curve of **1** by sec-butyl alcohol. The chemical shift of amide NH protons on **1** is monitored.

## 5. Monitoring the Hydrolysis Kinetics of Esters

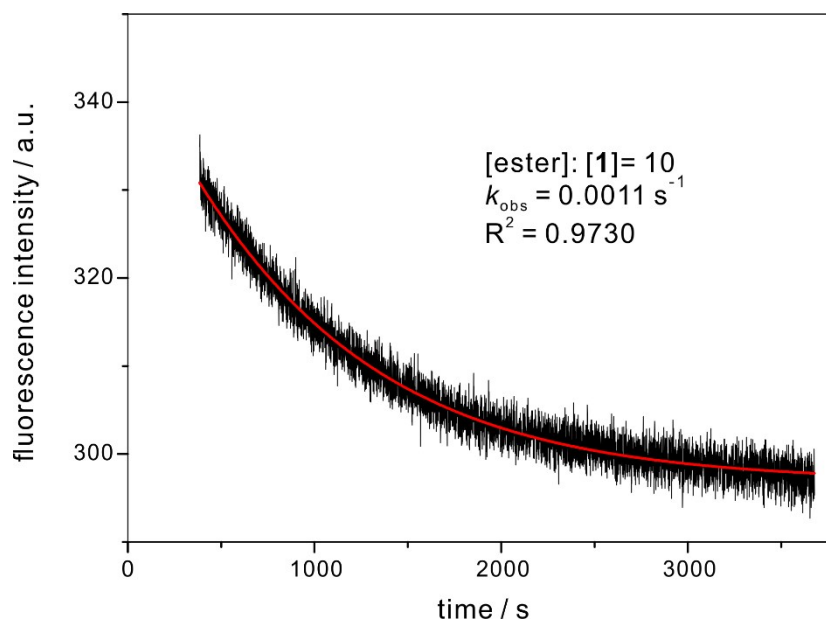

**Fig. S21** Curve fitting of the hydrolytic data of ethyl acetate ([G]: [H] = 10: 1).

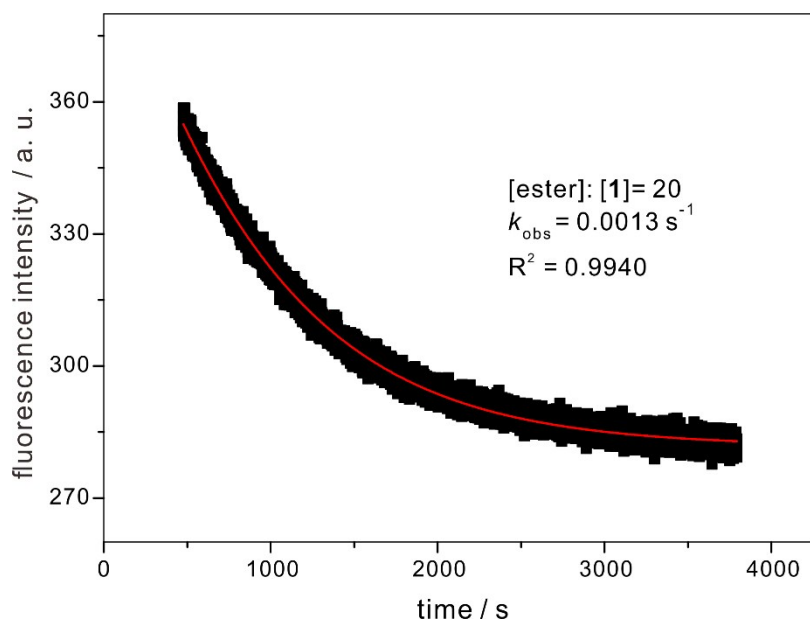

**Fig. S22** Curve fitting of the hydrolytic data of ethyl acetate ([G]: [H] = 20: 1).

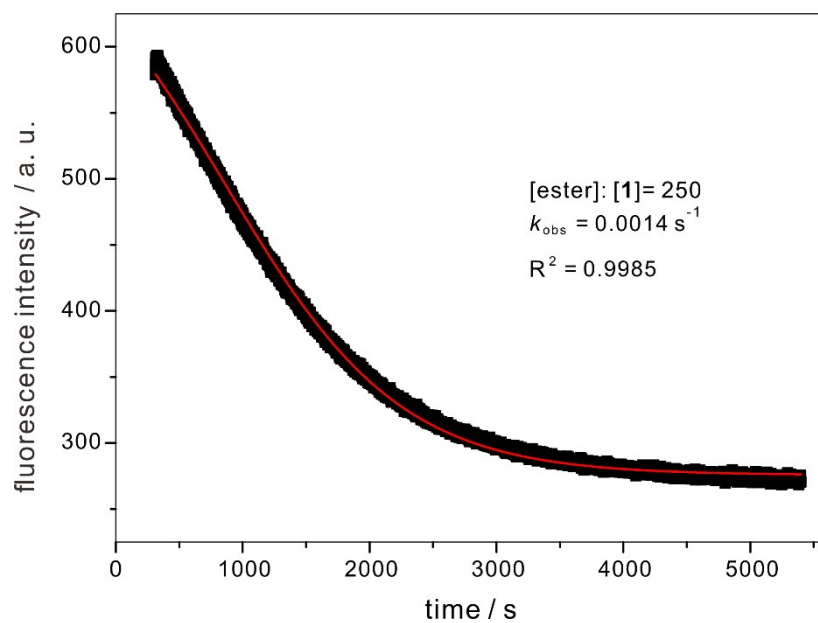

**Fig. S23** Curve fitting of the hydrolytic data of ethyl acetate ([G]: [H] = 250: 1).

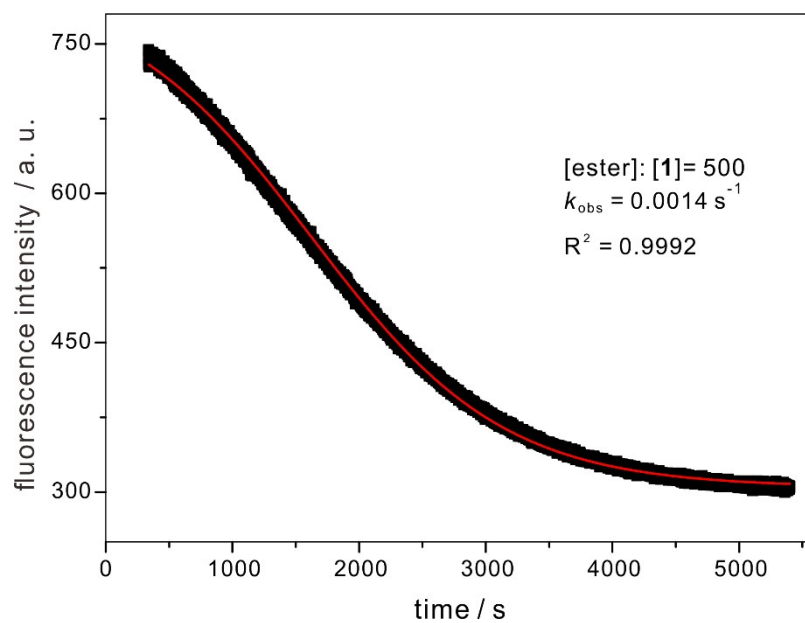

**Fig. S24** Curve fitting of the hydrolytic data of ethyl acetate ([G]: [H] = 500: 1).

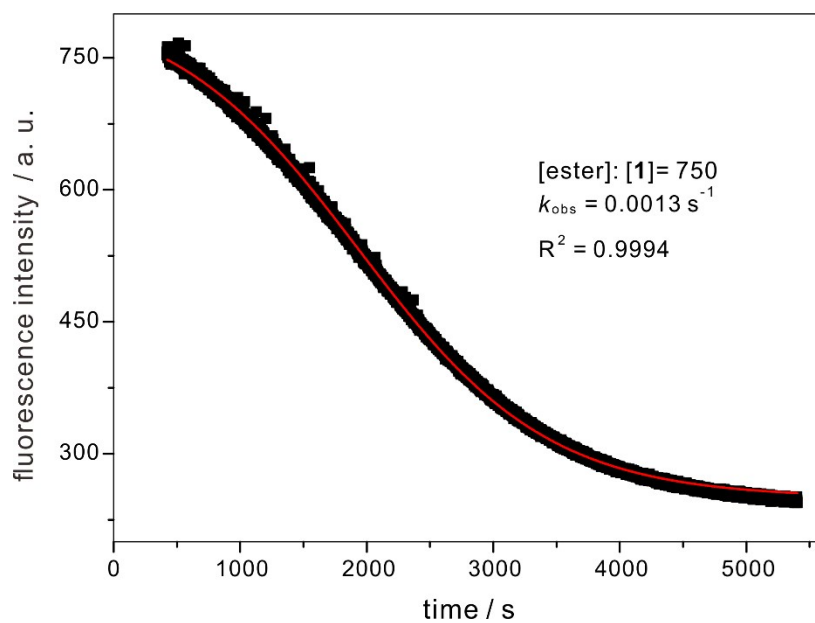

**Fig. S25** Curve fitting of the hydrolytic data of ethyl acetate ([G]: [H] = 750: 1).

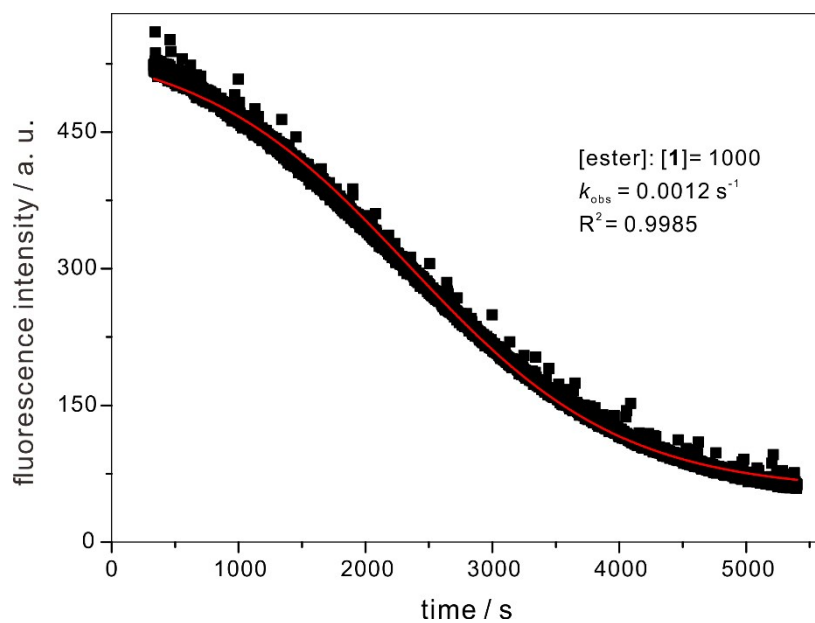

**Fig. S26** Curve fitting of the hydrolytic data of ethyl acetate ([G]: [H] = 1000: 1).

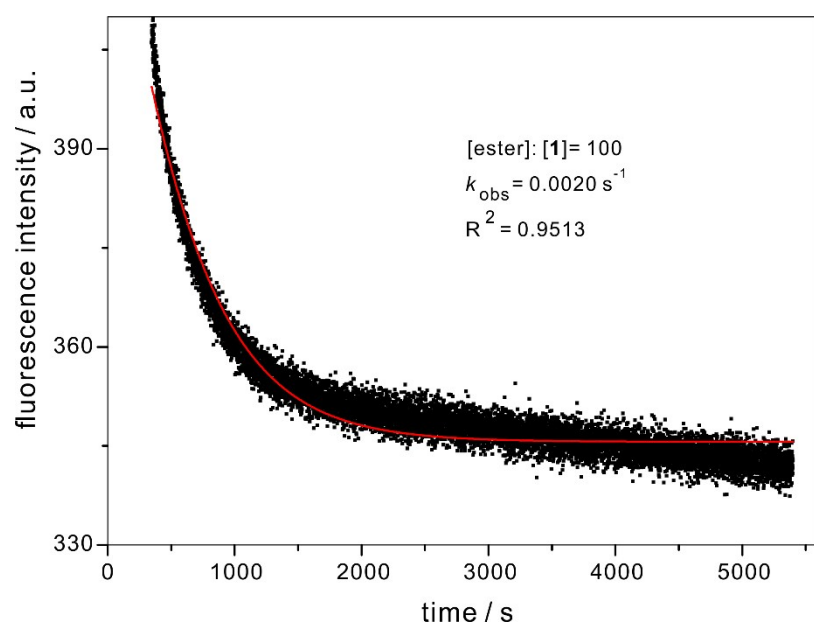

**Fig. S27** Curve fitting of the hydrolytic data of methyl acetate ([G]: [H] = 100: 1).

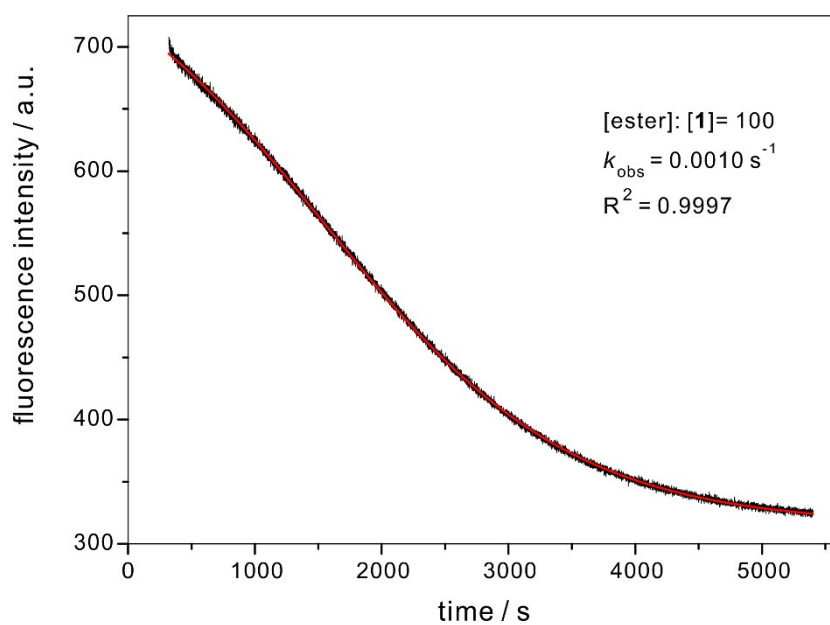

**Fig. S28** Curve fitting of the hydrolytic data of propyl acetate ([G]: [H] = 100: 1).

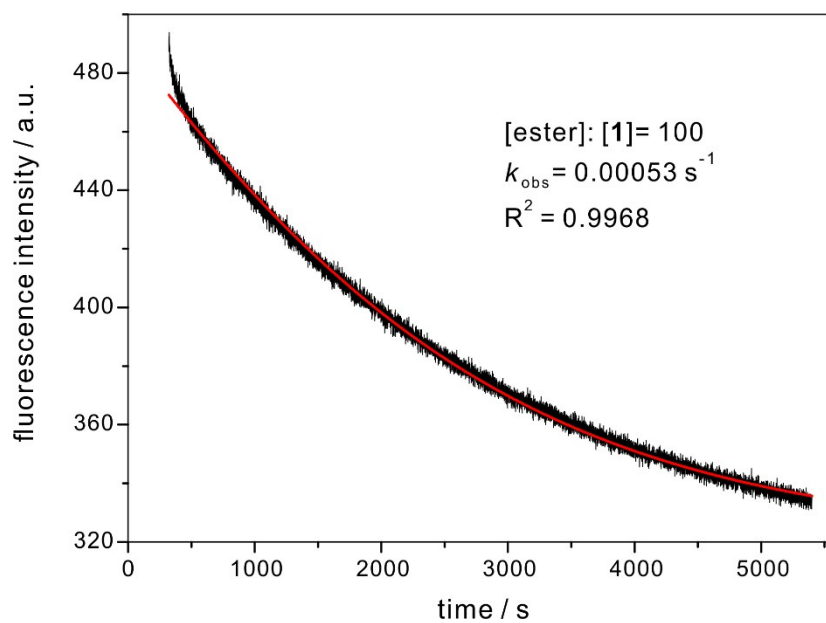

**Fig. S29** Curve fitting of the hydrolytic data of isopropyl acetate ([G]: [H] = 100: 1).

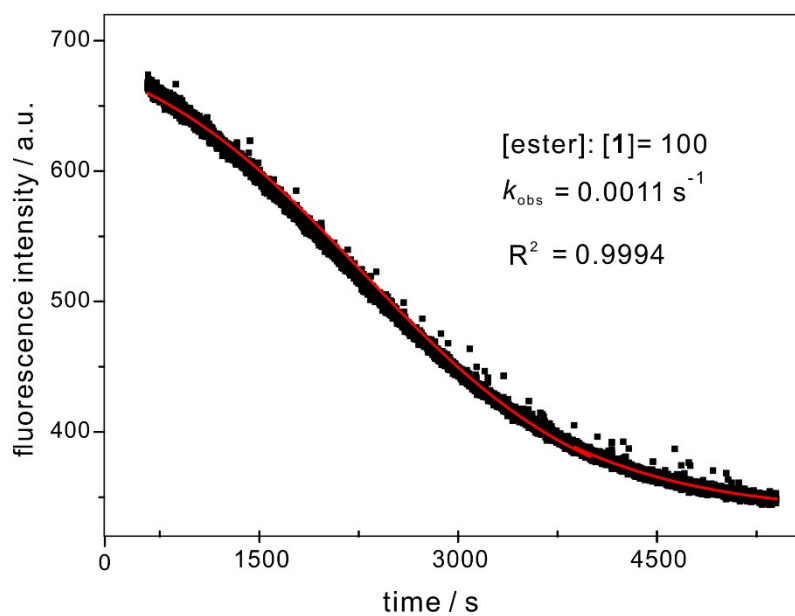

**Fig. S30** Curve fitting of the hydrolytic data of butyl acetate ([G]: [H] = 100: 1).

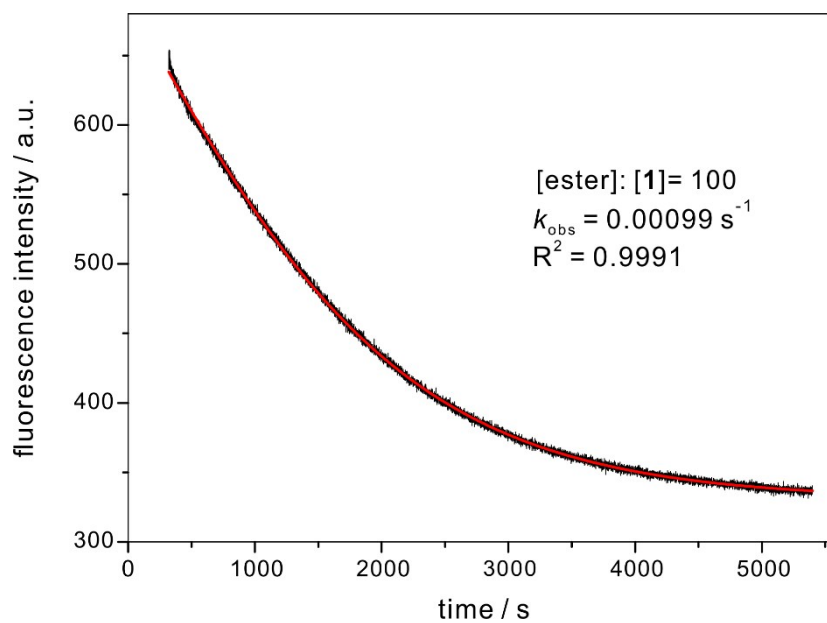

**Fig. S31** Curve fitting of the hydrolytic data of isobutyl acetate ([G]: [H] = 100: 1).

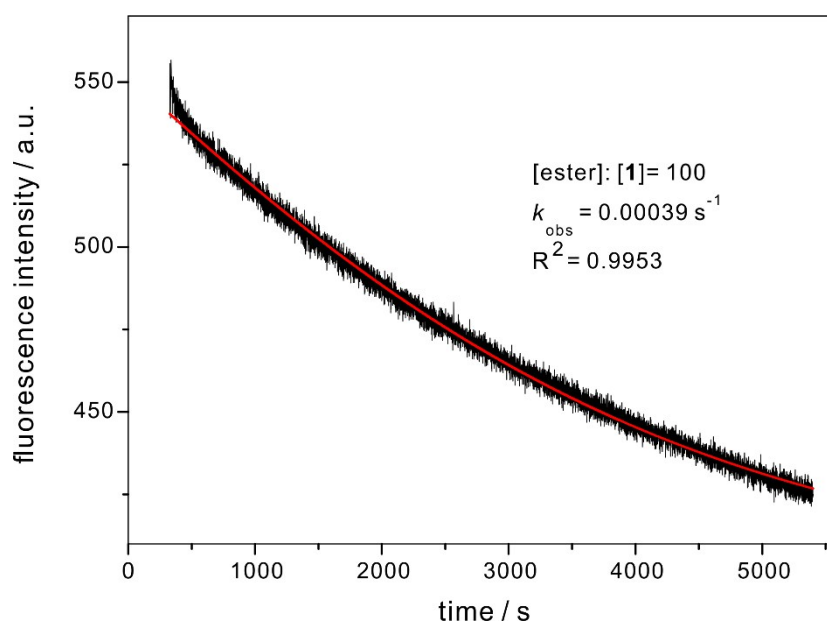

**Fig. S32** Curve fitting of the hydrolytic data of sec-butyl acetate ([G]: [H] = 100: 1).

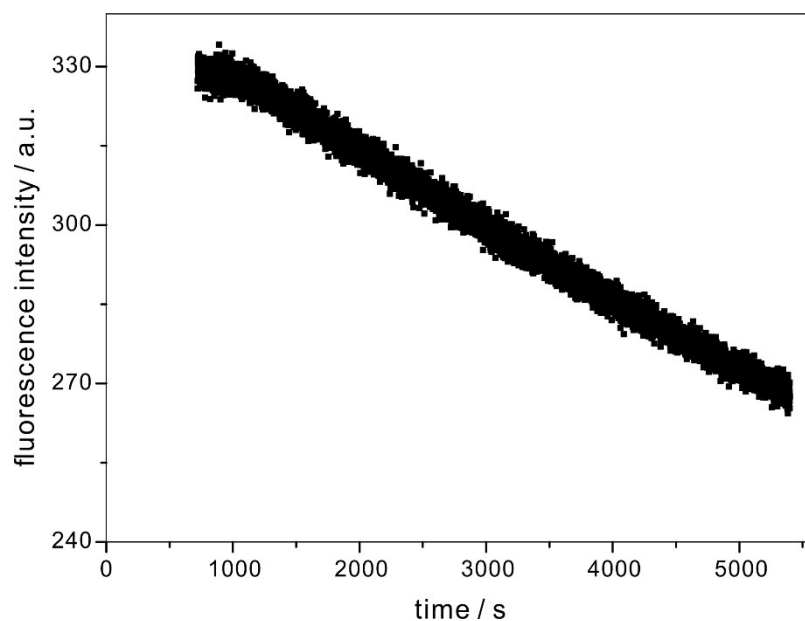

**Fig. S33** Fluorescence change during the hydrolysis of *tert*-butyl acetate ([G]: [H] = 100: 1). The hydrolysis is too slow to allow the determination of the apparent rate constant.

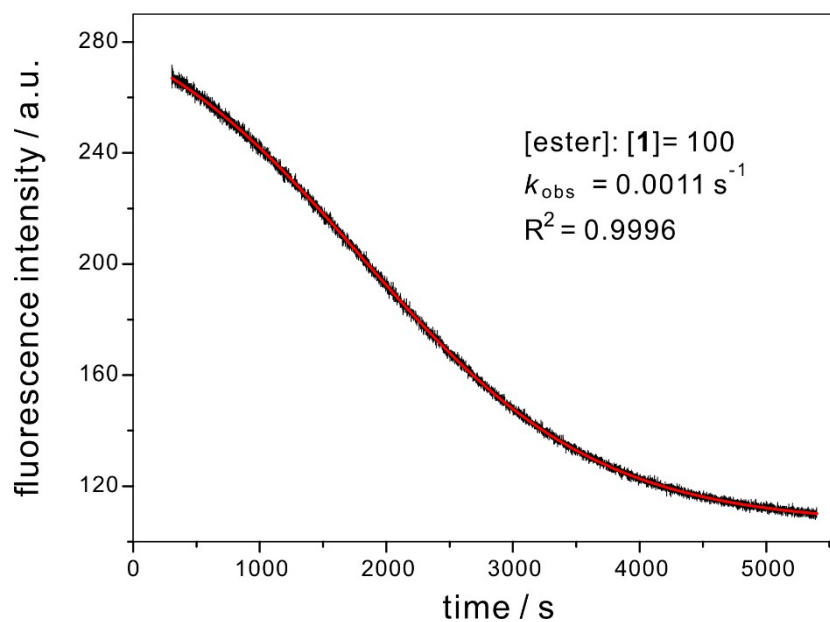

**Fig. S34** Curve fitting of the hydrolytic data of ethyl propionate ([G]: [H] = 100: 1).

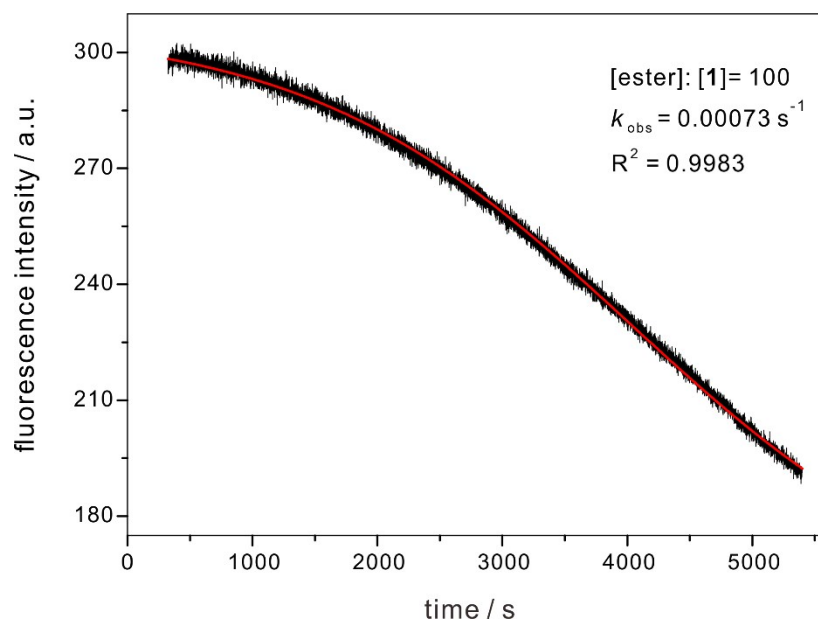

**Fig. S35** Curve fitting of the hydrolytic data of ethyl butyrate ([G]: [H] = 100: 1).

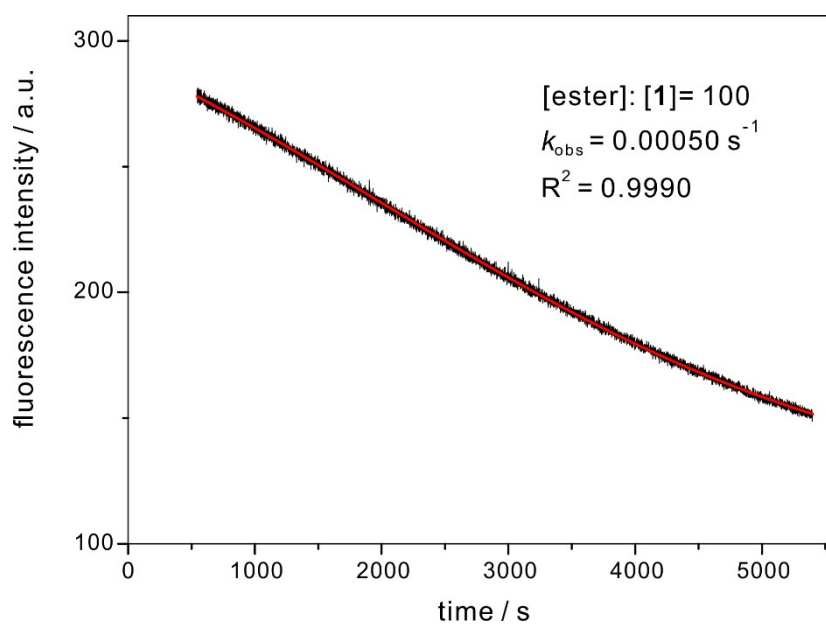

**Fig. S36** Curve fitting of the hydrolytic data of ethyl isobutyrate ([G]: [H] = 100: 1).

## 6. Derivation of Equations on the Hydrolysis Kinetics

The experimentally derived data for the hydrolysis of esters in the presence of molecular tube **1** was fitted to the kinetic scheme defined by (7). In this scheme,  $K_e$  and  $K_a$  corresponds to the binding constant of the molecular tube **1** (fluorescent receptor) to the ester (substrate) and alcohol (product), respectively. Due to there is no obvious binding behaviour between molecular tube and all the carboxylates, this binding is ignored.  $k_{obs}$  is the apparent rate constant of ester hydrolysis reaction (pseudo first-order reaction) under the experimental conditions.

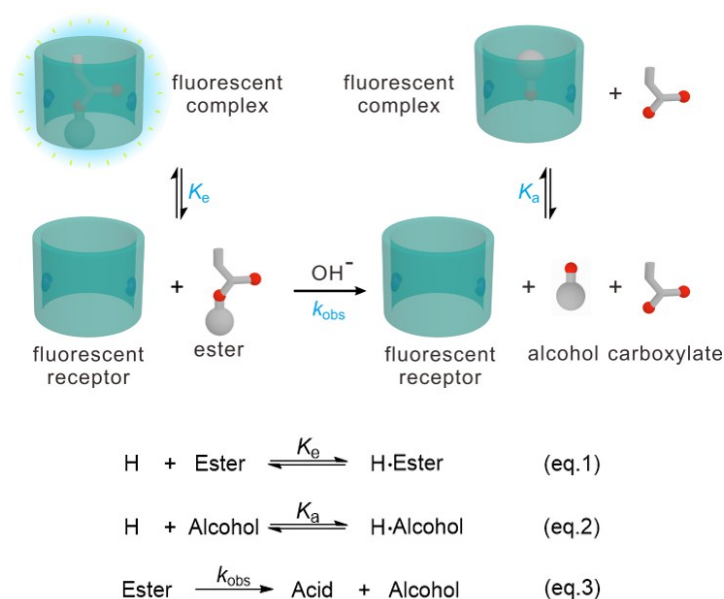

According to eq.1, eq.2 and eq.3, the following equations could be obtained:

$$\frac{[H \cdot \text{ester}]}{[H] \times [\text{ester}]} = K_e \quad (1)$$

$$\frac{[H \cdot \text{alcohol}]}{[H] \times [\text{alcohol}]} = K_a \quad (2)$$

$$[\text{ester}] = [\text{ester}]_0 \times e^{-k_{obs} \times t} \quad (3)$$

$$[alcohol] = [ester]_0 \times (1 - e^{-k_{obs} \times t}) \quad (4)$$

$$[H]_0 = [H] + [H \cdot ester] + [H \cdot alcohol] \quad (5)$$

The observed fluorescence intensity  $F_t$  consisted of free molecular tube **H**, host-guest complex **H • ester** and **H • alcohol** at different time in the system follows (5) since it obeys similar Lambert-Beer law:

$$\begin{aligned} F_t &= F_H + F_{H \cdot ester} + F_{H \cdot alcohol} = [H] \times F_H^\theta + [H \cdot ester] \times F_{H \cdot ester}^\theta + [H \cdot alcohol] \times F_{H \cdot alcohol}^\theta \end{aligned} \quad (6)$$

The final equation  $F_t = f(t, [H]_0, [ester]_0, K_e, K_a, k_{obs})$  is obtained from (1) to (6):

$$F_t = \frac{[H]_0(F_H^\theta + K_e[ester]_0 e^{-k_{obs}t} F_{H \cdot ester}^\theta + K_a[ester]_0(1 - e^{-k_{obs}t}) F_{H \cdot alcohol}^\theta)}{1 + K_e[ester]_0 e^{-k_{obs}t} + K_a[ester]_0(1 - e^{-k_{obs}t})} \quad (7)$$

$F_t$  : observed fluorescence intensity at different time,

$[H]_0, [ester]_0$  : the initial concentration of molecular tube and ester,

$F_H^\theta, F_{H \cdot ester}^\theta$  and  $F_{H \cdot alcohol}^\theta$  : fluorescence intensity of molecular tube **H**, complex **H • ester** and **H • alcohol** per mole,

$K_e, K_a$  : the binding constants of macrocycle tube **H** to the ester and alcohol, respectively.

$k_{obs}$  : the apparent rate constant of ester hydrolysis reaction (pseudo first-order reaction) under the chosen experimental conditions.
